# Supplementary figures and images for: Ultrasensitive electrochemical detection of parvovirus B19 DNA by combining CRISPR-Cas12a and multivalent framework nucleic acids
Source: Royal Society of Chemistry journal article supplement (doi:10.1039/d5ay01285f), 2025-01-01

Figure S1

Figure S2

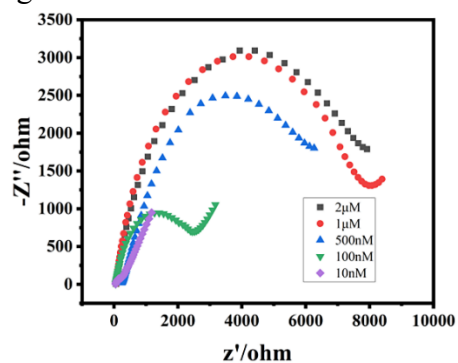

Figure S3

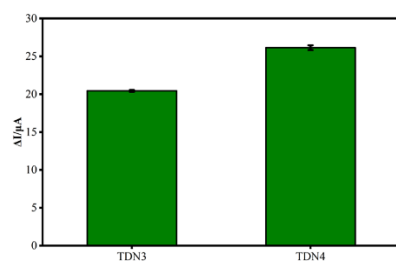

Figure S4

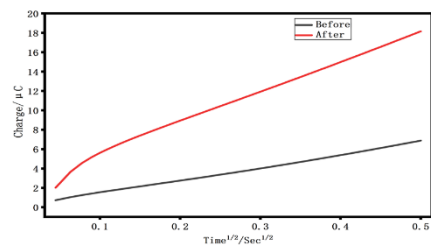

Supplement: d5ay01285f2.pdf [file d5ay01285f2.pdf]
